# Supplementary material for: Mapping how information about childhood vaccination is communicated in two regions of Cameroon: What is done and where are the gaps?
Source: PubMed Central journal article supplement (PMC4687068; doi:10.1186/s12889-015-2557-9), 2015-12-21
Supplement: 12889_2015_2557_MOESM1_ESM.pdf [file 12889_2015_2557_MOESM1_ESM.pdf]

## **Supplementary document 1**

Questions included in the survey of parents and caregivers:

- 1) Do you know which disease we are vaccinating against today?
- 2) Have you heard about the new cases of polio in Cameroon?
- 3) Do you know that there was going to be a campaign this weekend?
- 4) If yes, how did you hear about the campaign?
- 5) What is the easiest way to inform you about the vaccination campaigns?
- 6) Have you heard that there is a new vaccine for babies 0-11 months?
- 7) Do you know what the vaccine is given for?
- 8) If yes, how did you hear about the new vaccine?

The survey was partially developed based on a discussion with the EPI office about what kind of information would be useful for them to have.
