# Supplementary material for: Mapping how information about childhood vaccination is communicated in two regions of Cameroon: What is done and where are the gaps?
Source: PubMed Central journal article supplement (PMC4687068; doi:10.1186/s12889-015-2557-9), 2015-12-21
Supplement: 12889_2015_2557_MOESM2_ESM.pdf [file 12889_2015_2557_MOESM2_ESM.pdf]

## Map of vaccination communication interventions in Cameron

Red text = Interventions included in campaigns only

Blue text = Interventions included in routine vaccination only

Purple text = Interventions included in both campaigns and routine

Green text = Interventions that participants suggested could be included

|                                                                            | <i>Parents or soon-to-be parents</i>                                                                    | <i>Communities, community members or volunteers</i>                                                                                                                                                                                                                                                               | <i>Health professionals</i>                                                                                    |
|----------------------------------------------------------------------------|---------------------------------------------------------------------------------------------------------|-------------------------------------------------------------------------------------------------------------------------------------------------------------------------------------------------------------------------------------------------------------------------------------------------------------------|----------------------------------------------------------------------------------------------------------------|
| Inform or Educate                                                          | <b>One on one interactions</b>                                                                          | <b>One on one interactions</b>                                                                                                                                                                                                                                                                                    | <b>One on one interactions</b>                                                                                 |
|                                                                            |                                                                                                         | <p>Social mobilizers who go door to door before the campaign to inform and map children</p> <p>Social mobilizers who go out with the vaccination team during campaigns</p> <p>Communicating with the neighbourhood chief</p> <p>Outreach activities for EPI vaccinations</p>                                      |                                                                                                                |
|                                                                            | <b>Group interactions</b>                                                                               | <b>Group interactions</b>                                                                                                                                                                                                                                                                                         | <b>Group interactions</b>                                                                                      |
|                                                                            | <p>Health talks before vaccination sessions</p> <p>Singing the vaccination song at the rural clinic</p> | <p>Announcements in church</p> <p>Announcements in Community Based Organizations (CBOs)</p> <p>Talking to kids at schools before or during campaigns</p> <p>Explanations to teachers and administrators at schools about the campaign</p> <p>Vaccination teams visiting churches and schools during campaigns</p> | <p>One day vaccinator training for campaigns</p> <p>One day training for vaccinators about the new vaccine</p> |
|                                                                            | <b>Mail</b>                                                                                             | <b>Mail</b>                                                                                                                                                                                                                                                                                                       | <b>Mail</b>                                                                                                    |
|                                                                            |                                                                                                         |                                                                                                                                                                                                                                                                                                                   |                                                                                                                |
|                                                                            | <b>Phone-based</b>                                                                                      | <b>Phone-based</b>                                                                                                                                                                                                                                                                                                | <b>Phone-based</b>                                                                                             |
|                                                                            |                                                                                                         | SMS sent by the ministry of health (only campaigns unless launching a new vaccine for EPI)                                                                                                                                                                                                                        |                                                                                                                |
| <b>Device or tool</b>                                                      | <b>Device or tool</b>                                                                                   | <b>Device or tool</b>                                                                                                                                                                                                                                                                                             |                                                                                                                |
| <p>The Vaccination Card</p> <p>The Child Health Book (Carnet de Santé)</p> | The vests worn by the vaccinators with information printed on them                                      |                                                                                                                                                                                                                                                                                                                   |                                                                                                                |

| Audio visual / performance                                                                                                                                                                                                                                                                         | Audio visual / performance                                                                                                                                                                                                                                                                                                                                                                                                                                                                                                                                                                                                                                                                                                                                                                                  | Audio visual / performance                                                    |
|----------------------------------------------------------------------------------------------------------------------------------------------------------------------------------------------------------------------------------------------------------------------------------------------------|-------------------------------------------------------------------------------------------------------------------------------------------------------------------------------------------------------------------------------------------------------------------------------------------------------------------------------------------------------------------------------------------------------------------------------------------------------------------------------------------------------------------------------------------------------------------------------------------------------------------------------------------------------------------------------------------------------------------------------------------------------------------------------------------------------------|-------------------------------------------------------------------------------|
|                                                                                                                                                                                                                                                                                                    | <p>Health programming that can be shown on the TV in the primary health clinic waiting room</p> <p>The organization of live performances at community hot points</p>                                                                                                                                                                                                                                                                                                                                                                                                                                                                                                                                                                                                                                        |                                                                               |
| Printed material                                                                                                                                                                                                                                                                                   | Printed material                                                                                                                                                                                                                                                                                                                                                                                                                                                                                                                                                                                                                                                                                                                                                                                            | Printed material                                                              |
| <p>The vaccination calendar poster hanging in the vaccination clinic</p> <p>Small pamphlets to send home with mothers containing the information from the Health Talk</p> <p>A flip chart with vaccination information and illustrations to use during health talks</p> <p>La boite aux images</p> | <p>Posters in waiting rooms or in the community i.e. at churches or schools (however these have very different messages for campaigns and routine)</p> <p>Letters to schools, CBOs and churches from DMO informing about the campaign</p> <p>Information sent to schools for local health centres to inform about an upcoming campaign</p> <p>Posters, banners and pamphlets (mostly campaigns unless launching a new vaccine for EPI)</p> <p>An educational flip chart to use in classrooms to teach children about vaccination</p> <p>Small pamphlets or coupons about a vaccination campaign to send home with children from school</p> <p>The media pack given to journalists before the launch of the rota virus vaccine</p> <p>Announcement board at the Quarter Head or community leader's house</p> | <p>The handbook of norms and standards produced by the Ministry of Health</p> |
| Web-based                                                                                                                                                                                                                                                                                          | Web-based                                                                                                                                                                                                                                                                                                                                                                                                                                                                                                                                                                                                                                                                                                                                                                                                   | Web-based                                                                     |
|                                                                                                                                                                                                                                                                                                    |                                                                                                                                                                                                                                                                                                                                                                                                                                                                                                                                                                                                                                                                                                                                                                                                             |                                                                               |

|                         |                                                                                                                                                                                                                                                                                                                                                                                  |                                                                                                                                                                                                                                                                                                                                                         |                                |
|-------------------------|----------------------------------------------------------------------------------------------------------------------------------------------------------------------------------------------------------------------------------------------------------------------------------------------------------------------------------------------------------------------------------|---------------------------------------------------------------------------------------------------------------------------------------------------------------------------------------------------------------------------------------------------------------------------------------------------------------------------------------------------------|--------------------------------|
|                         |                                                                                                                                                                                                                                                                                                                                                                                  | <b>Media campaign</b>                                                                                                                                                                                                                                                                                                                                   |                                |
|                         |                                                                                                                                                                                                                                                                                                                                                                                  | <p>Town crier</p> <p>Caravan with radio loudspeaker</p> <p>Radio Announcements</p> <p>Interactive Radio Programming</p> <p>TV Spots</p> <p>Interviews on TV or TV Health Programming</p> <p>TV News casts</p> <p>Reports in News Papers</p>                                                                                                             |                                |
|                         |                                                                                                                                                                                                                                                                                                                                                                                  | <b>Community event</b>                                                                                                                                                                                                                                                                                                                                  |                                |
|                         |                                                                                                                                                                                                                                                                                                                                                                                  | <p>Gathering at the quarter head's house or a church to be vaccinated</p> <p>Giving vaccinations at community events such as the Women's Day Parade</p> <p>Advocacy meeting with church goers or members of a CBO</p> <p>Mobilization meetings with CBOs, Health Committees or Community Leaders</p>                                                    |                                |
|                         |                                                                                                                                                                                                                                                                                                                                                                                  | <b>Celebrity spokespeople</b>                                                                                                                                                                                                                                                                                                                           |                                |
|                         |                                                                                                                                                                                                                                                                                                                                                                                  | <p>The first lady launched the new rotavirus campaign and is known as the godmother of vaccination</p> <p>A football player was used in adds to promote vaccination</p>                                                                                                                                                                                 |                                |
| <b>Remind or Recall</b> | <p><b>One on one interactions</b></p> <p>Social Mobilizers who are sent into the community to follow up drop outs</p> <p>Reminder of the next vaccination at the clinic</p> <p><b>Group Interactions</b></p> <p>Health Talks at routine vaccinations to remind about the next appointment</p> <p>Health talks at routine vaccinations that remind about an upcoming campaign</p> | <p><b>One on one interactions</b></p> <p>Social mobilizers going door to door to remind about the campaign and map children</p> <p>Interactions with community leaders to remind them of an upcoming campaign and ask them to remind their communities</p> <p><b>Group Interactions</b></p> <p>Announcements in church</p> <p>Announcements in CBOs</p> | <b>One on one interactions</b> |

|                                                                                                                                                                                     |                                                                                                                                                                                                                                                                                                                                                              |                                                             |                                                             |
|-------------------------------------------------------------------------------------------------------------------------------------------------------------------------------------|--------------------------------------------------------------------------------------------------------------------------------------------------------------------------------------------------------------------------------------------------------------------------------------------------------------------------------------------------------------|-------------------------------------------------------------|-------------------------------------------------------------|
|                                                                                                                                                                                     |                                                                                                                                                                                                                                                                                                                                                              | Announcements in Schools                                    |                                                             |
| Mail                                                                                                                                                                                | Mail                                                                                                                                                                                                                                                                                                                                                         | Mail                                                        | Mail                                                        |
| <b>Phone-based</b><br>A phone with credit to call parents who have not come for their appointments                                                                                  | <b>Phone-based</b><br>SMS reminder about upcoming campaign<br><br><b>Media Campaign*</b><br>Town crier<br><br>Radio Announcements<br><br>TV Spots<br><br>TV News casts<br><br>Reports in News Papers<br>*These media sources are included here as well as under <i>inform and educate</i> as when they are repeated they become a form of remind and recall. | <b>Phone-based</b>                                          |                                                             |
| <b>Device or tool</b><br>The Vaccination Card<br><br>The Child Health Book (Carnet de Santé)<br><br><b>Printed Material</b><br>Poster of the vaccination calendar at the EPI Clinic | <b>Device or tool</b><br>A statue promoting vaccination that was located in the middle of the busy traffic circle<br><br><b>Printed material</b>                                                                                                                                                                                                             | <b>Device or tool</b>                                       |                                                             |
|                                                                                                                                                                                     | Training in how to communicate/ provide education to others                                                                                                                                                                                                                                                                                                  | Training in how to communicate/ provide education to others | Training in how to communicate/ provide education to others |

|                             |                                                                                                                              |                                                                                                                             |                                                                                                                                                                   |
|-----------------------------|------------------------------------------------------------------------------------------------------------------------------|-----------------------------------------------------------------------------------------------------------------------------|-------------------------------------------------------------------------------------------------------------------------------------------------------------------|
| Teach Skills                |                                                                                                                              | Advocacy meetings with members of a church or CBO to teach the importance of vaccination and how to communicate the message | Campaign training day where vaccinators are taught how to communicate with parents<br><br>Training day for vaccinators before the launch of the rotavirus vaccine |
|                             | Parenting skills programs                                                                                                    |                                                                                                                             |                                                                                                                                                                   |
| Provide Support             | One on one interactions                                                                                                      |                                                                                                                             |                                                                                                                                                                   |
|                             | Group interactions                                                                                                           |                                                                                                                             |                                                                                                                                                                   |
|                             | Phone-based                                                                                                                  |                                                                                                                             |                                                                                                                                                                   |
|                             | Web-based                                                                                                                    |                                                                                                                             |                                                                                                                                                                   |
| Facilitate Decision Making  | Decision aids                                                                                                                |                                                                                                                             | Decision aids                                                                                                                                                     |
|                             |                                                                                                                              |                                                                                                                             |                                                                                                                                                                   |
| Enable Communication        | Interpreters                                                                                                                 |                                                                                                                             |                                                                                                                                                                   |
|                             |                                                                                                                              |                                                                                                                             |                                                                                                                                                                   |
| Enhance Community Ownership | Program delivery                                                                                                             | Local opinion leaders                                                                                                       |                                                                                                                                                                   |
|                             | Health workers who encourage users to talk about EPI or the campaign in the neighbourhoods                                   | The quarter head who is mobilized to gather people on vaccination day                                                       |                                                                                                                                                                   |
|                             |                                                                                                                              | Community input                                                                                                             |                                                                                                                                                                   |
|                             |                                                                                                                              | Members of the community (including children) who help vaccination teams to find non-vaccinated children                    |                                                                                                                                                                   |
|                             | Program delivery                                                                                                             |                                                                                                                             |                                                                                                                                                                   |
|                             | Community coalition                                                                                                          |                                                                                                                             |                                                                                                                                                                   |
|                             | Meetings to support groups in the community who work with vaccination such as churches, women's groups and health committees |                                                                                                                             |                                                                                                                                                                   |
|                             | Partnership building                                                                                                         |                                                                                                                             |                                                                                                                                                                   |
|                             | Partnerships with local CBOs, churches and mosques                                                                           |                                                                                                                             |                                                                                                                                                                   |
|                             | Social Mobilizers who are selected by their communities                                                                      |                                                                                                                             |                                                                                                                                                                   |
